# Supplementary material for: The role of the AP-1 adaptor complex in outgoing and incoming membrane traffic
Source: PubMed Central journal article supplement (PMC10996651; doi:10.1083/jcb.202310071), 2024-04-05

**B**

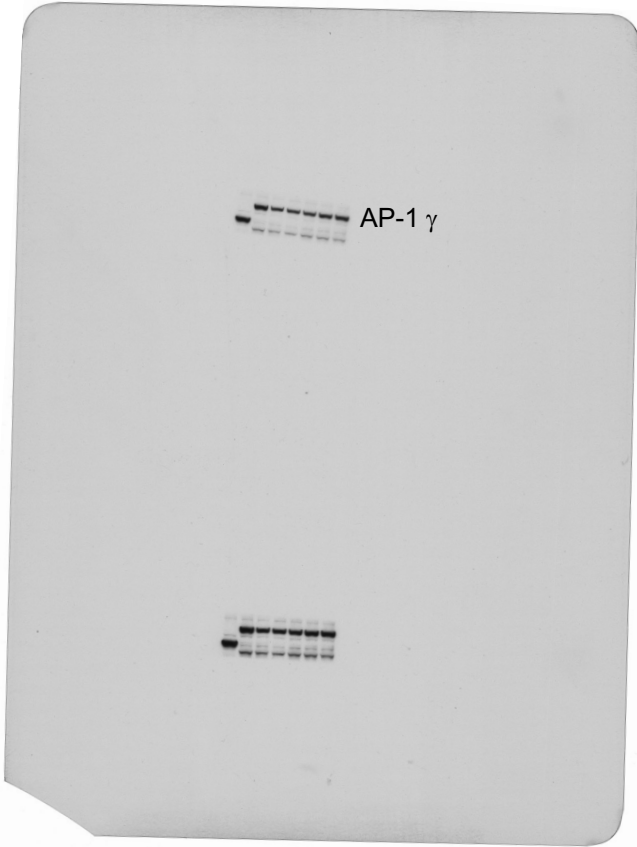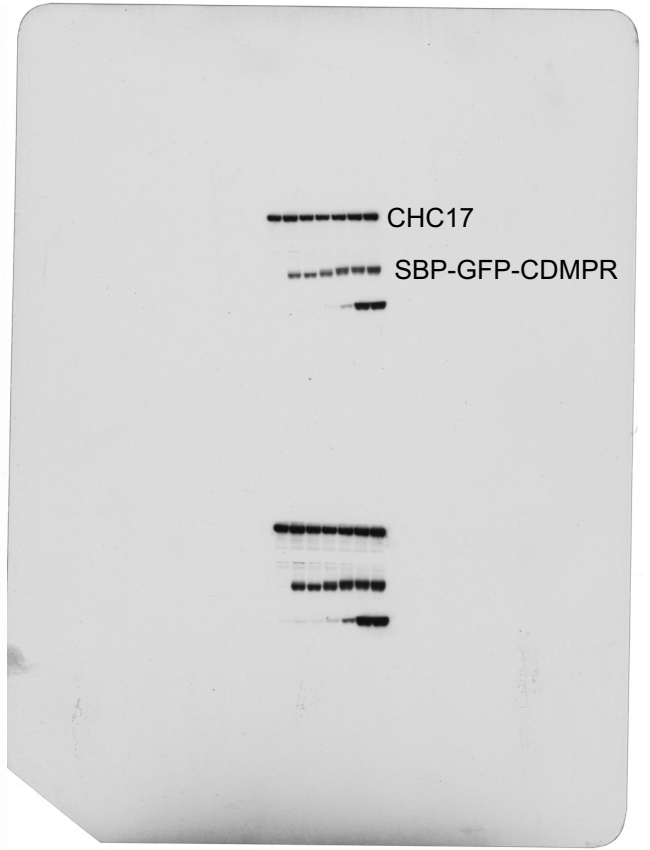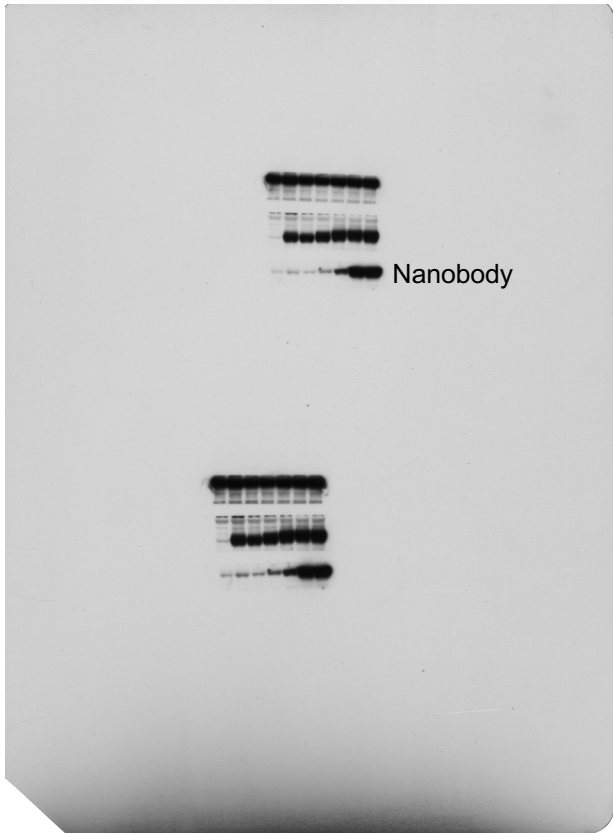

Supplement: JCB_202310071_SourceDataF2.pdf [file JCB_202310071_SourceDataF2.pdf]
