# Supplementary material for: The role of the AP-1 adaptor complex in outgoing and incoming membrane traffic
Source: PubMed Central journal article supplement (PMC10996651; doi:10.1083/jcb.202310071), 2024-04-05

**C**

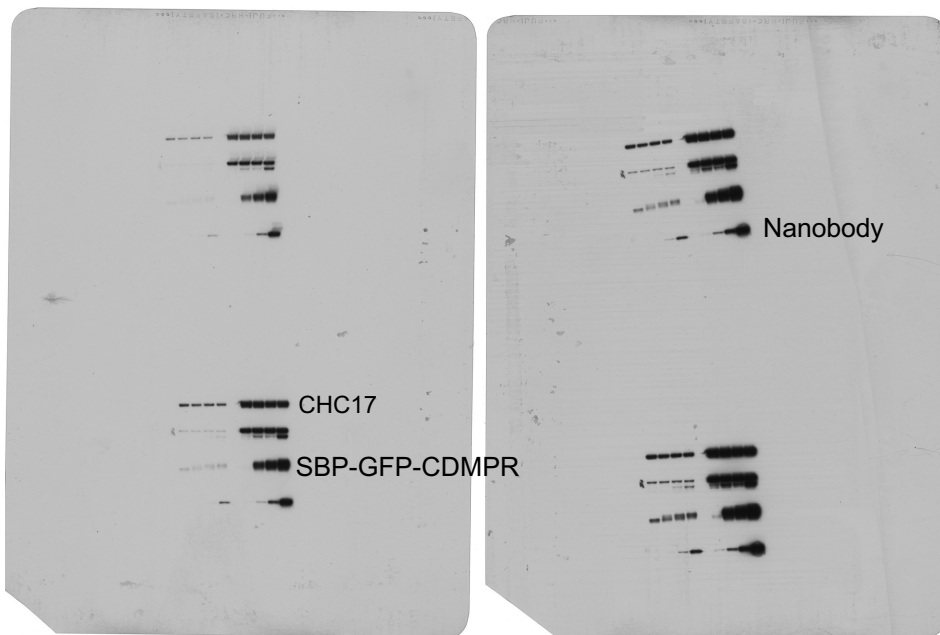

**E**

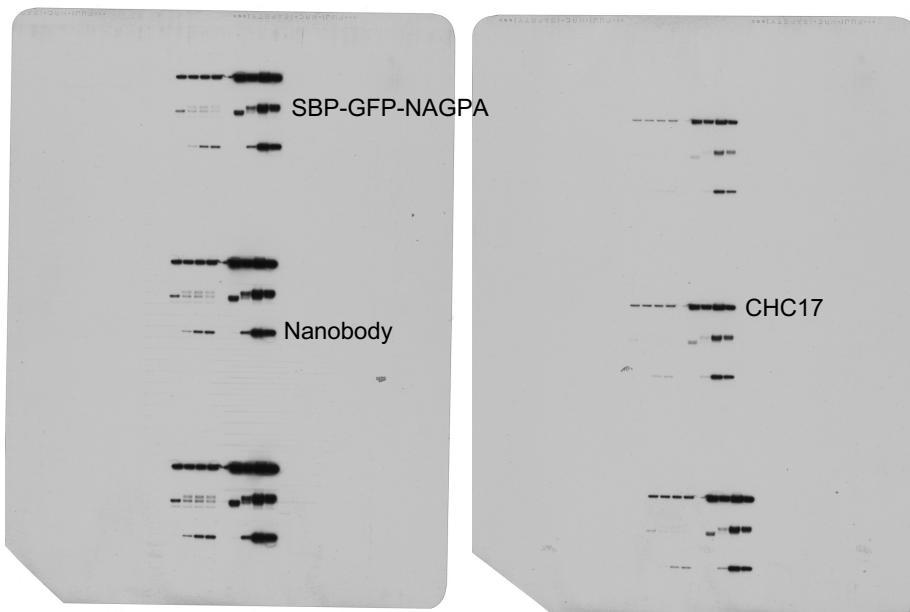

**G**

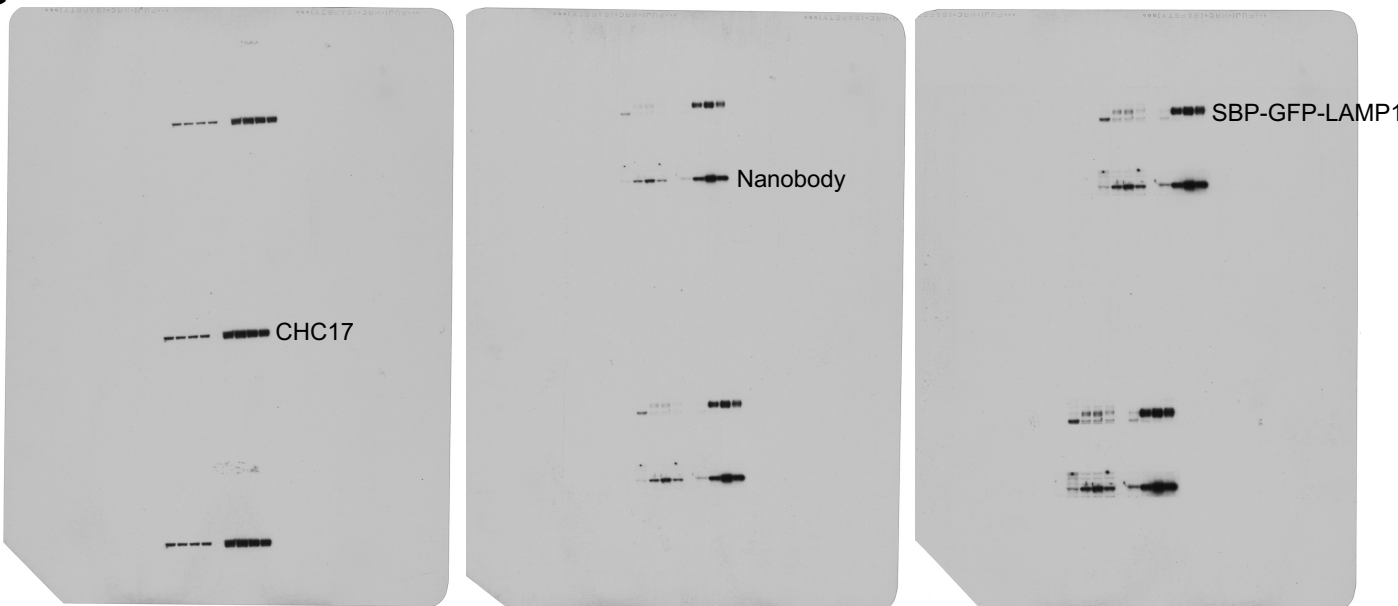

Supplement: JCB_202310071_SourceDataF5.pdf [file JCB_202310071_SourceDataF5.pdf]
