# Supplementary material for: The role of the AP-1 adaptor complex in outgoing and incoming membrane traffic
Source: PubMed Central journal article supplement (PMC10996651; doi:10.1083/jcb.202310071), 2024-04-05

**A**

First 10 lanes  
in the figure

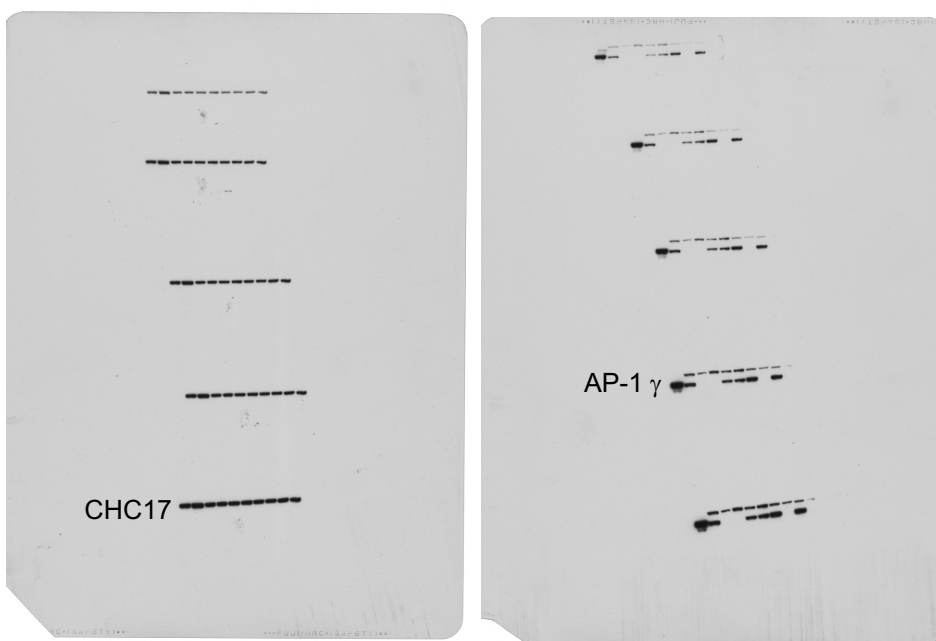

Middle 6 lanes  
(1<sup>st</sup> 2 lanes on the left not used)

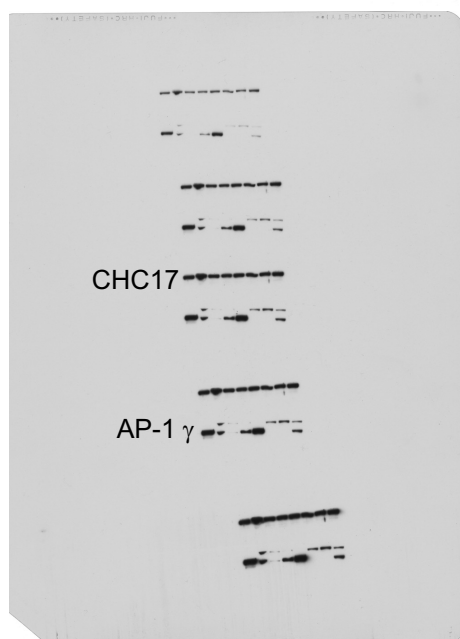

Last 3 lanes  
(lanes 2-4 on the blot)

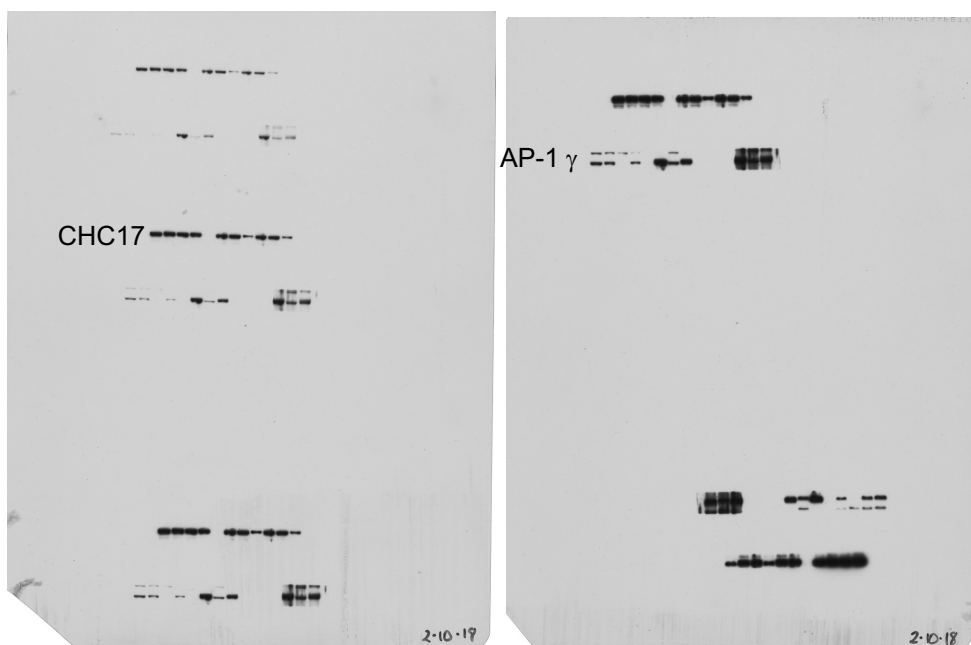

Supplement: JCB_202310071_SourceDataFS1.pdf [file JCB_202310071_SourceDataFS1.pdf]
