# Supplementary material for: The role of the AP-1 adaptor complex in outgoing and incoming membrane traffic
Source: PubMed Central journal article supplement (PMC10996651; doi:10.1083/jcb.202310071), 2024-04-05
Supplement: JCB_202310071_SourceDataFS4.pdf [file JCB_202310071_SourceDataFS4.pdf]

**A**

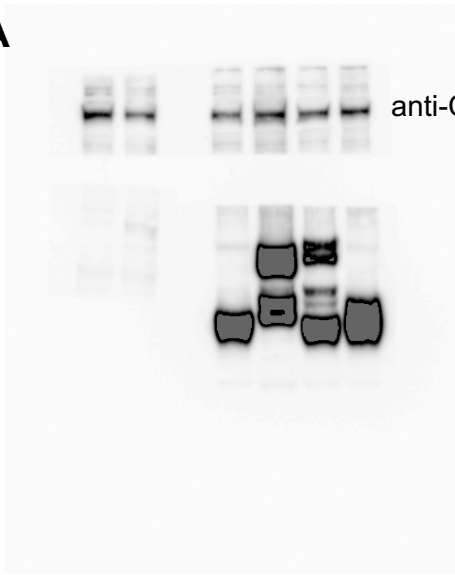

anti-CIMPR

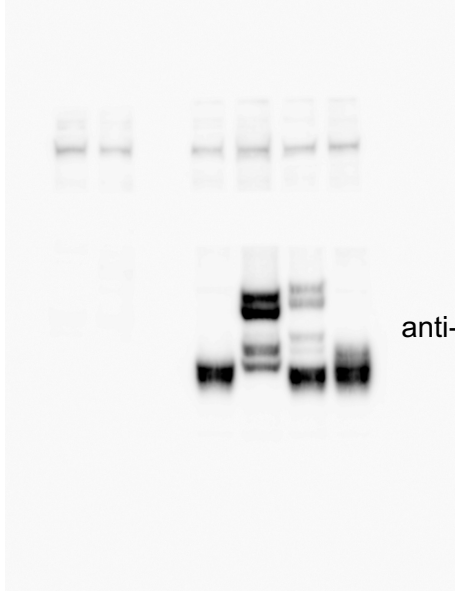

anti-SBP
